# Supplementary material
Source: PubMed Central journal article supplement (PMC6461051)
Supplement: NIHMS1518484-supplement-FigS4.pdf [file NIHMS1518484-supplement-FigS4.pdf]

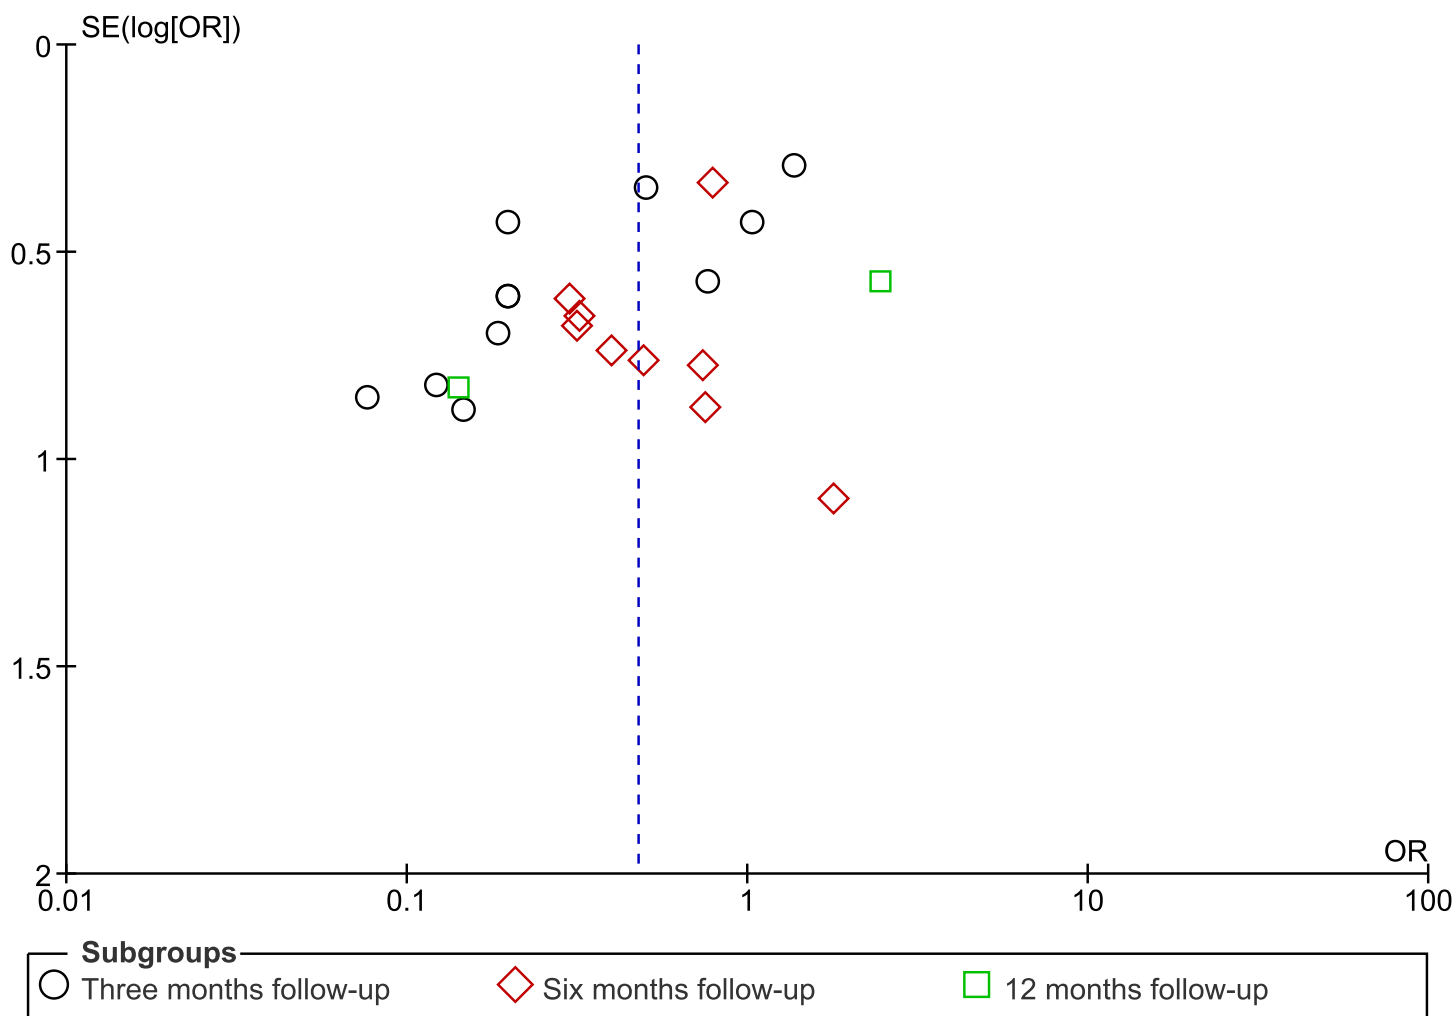

Suppl. Fig. 4. Funnel plot. In a graphical analysis of publication [48], we plotted effect estimates versus precision for all outcomes at any follow-up interval for all breast surgery studies, with odds ratio in the x-axis and standard error in the y-axis. For most surgical subgroups, not enough study data was available. Despite a lack of evidence for publication bias in this funnel plot, we acknowledge the risk of publication bias in our review given that not all study outcome data were available for evidence synthesis as detailed in our Cochrane Review [29].
